# Supplementary material
Source: PubMed Central journal article supplement (PMC4356344)
Supplement: cdd2014213x1.pdf [file cdd2014213x1.pdf]

Chandran UR, et al.,

LaTulippe E, et al.,

Lapointe J et al.,

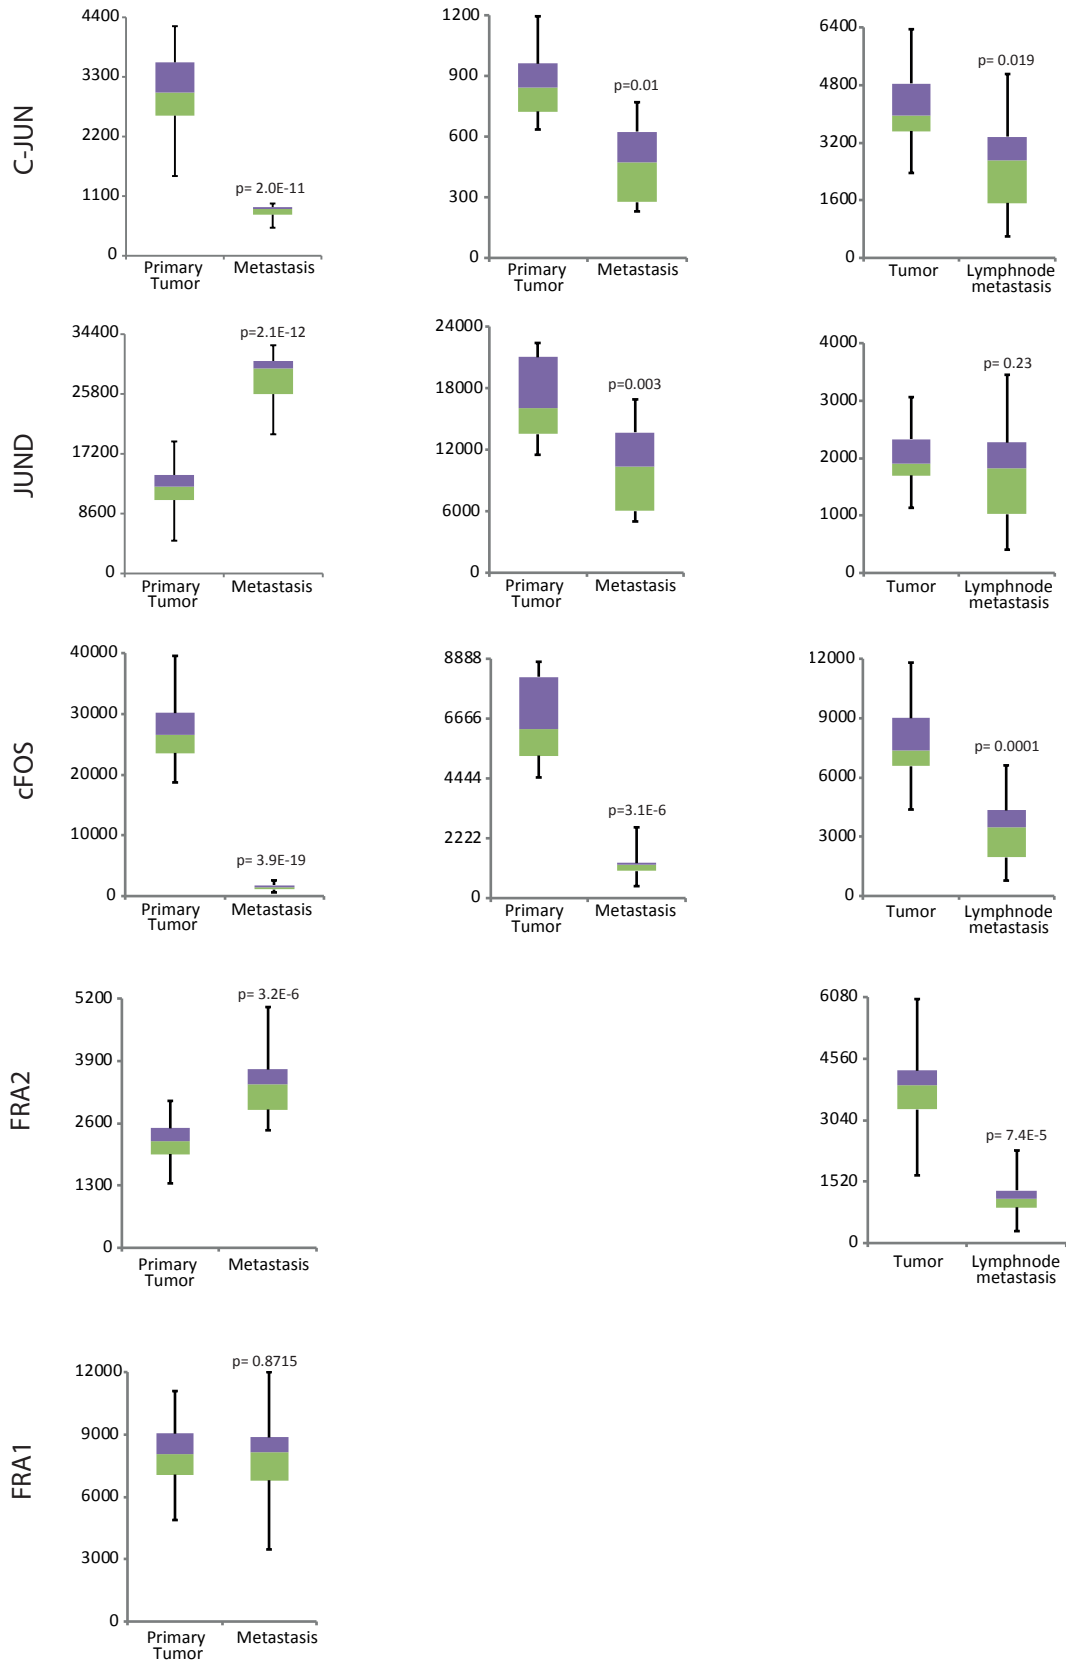

Supplementary figure 1

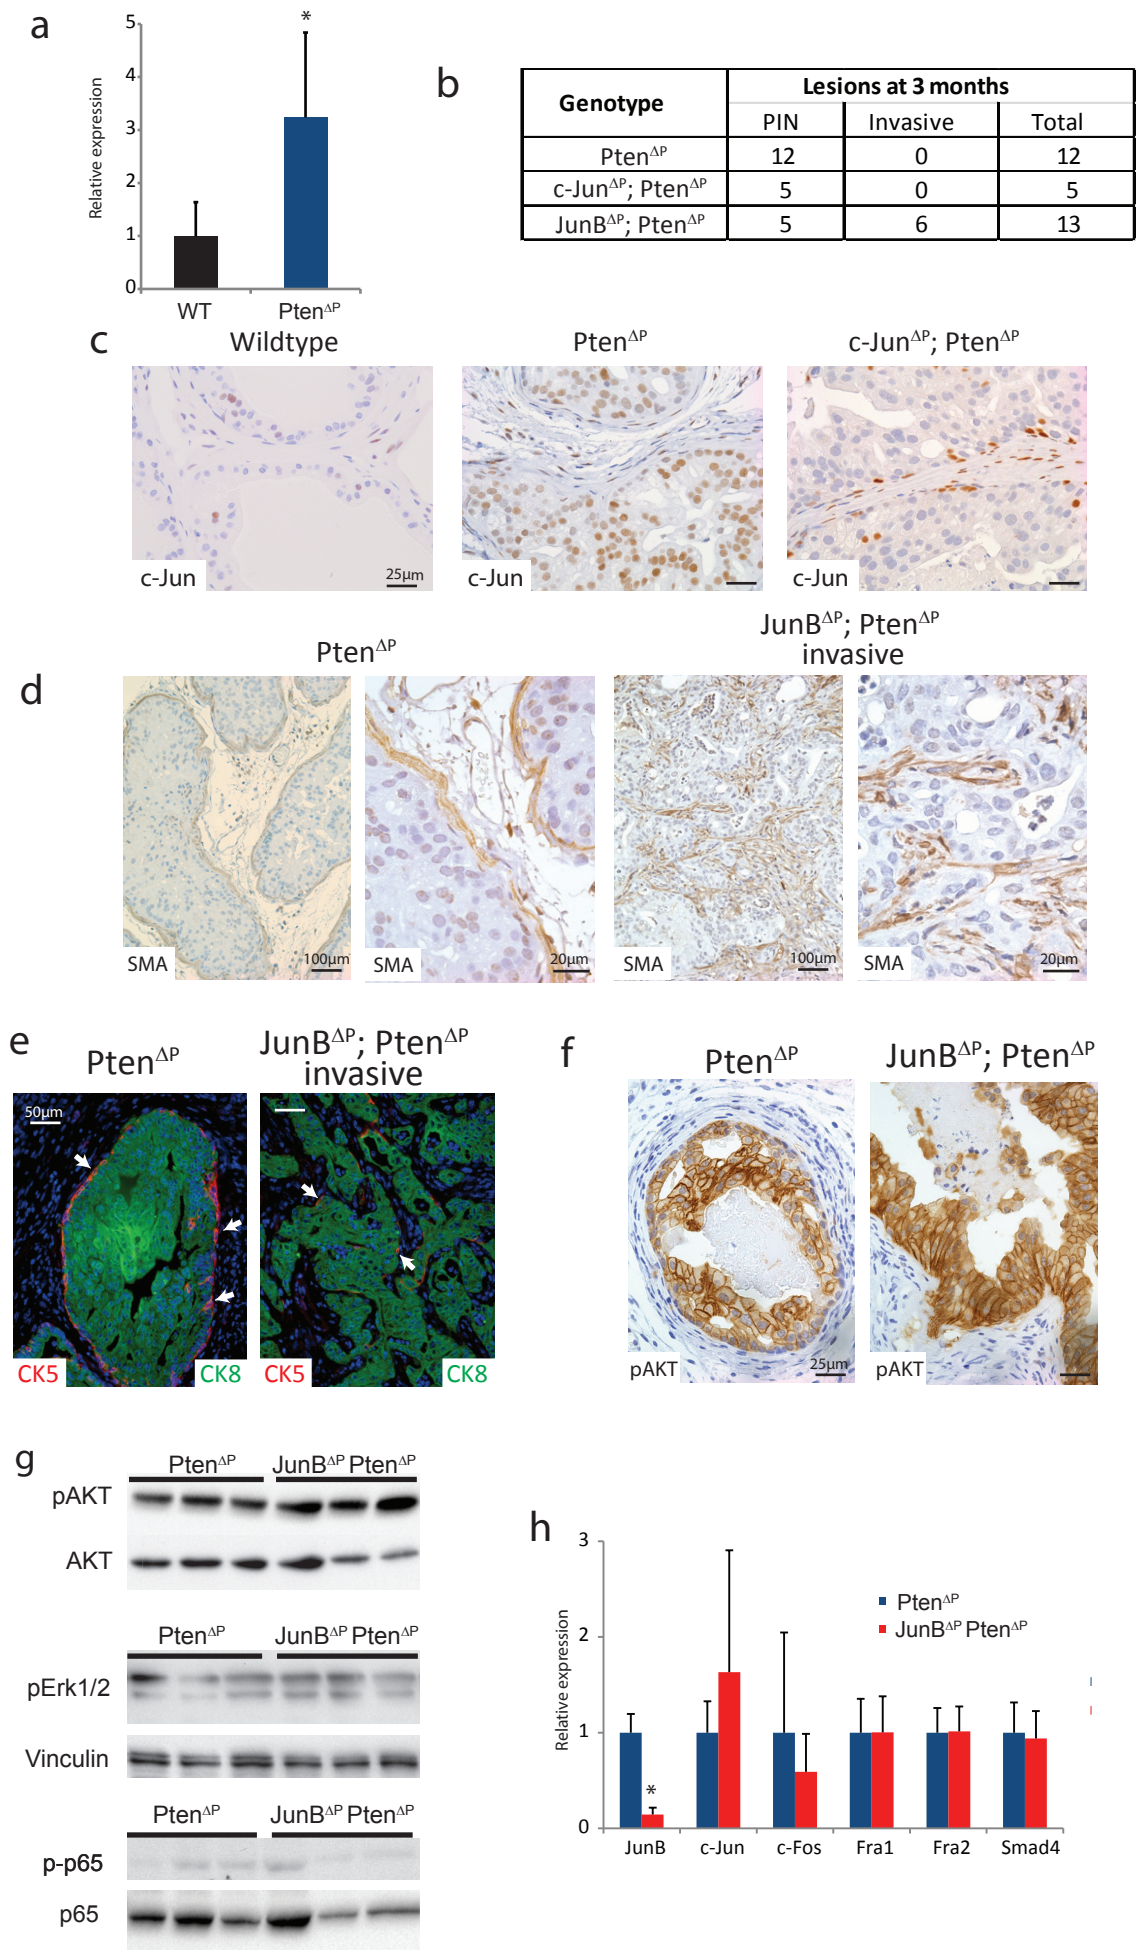

Supplementary figure 2

a

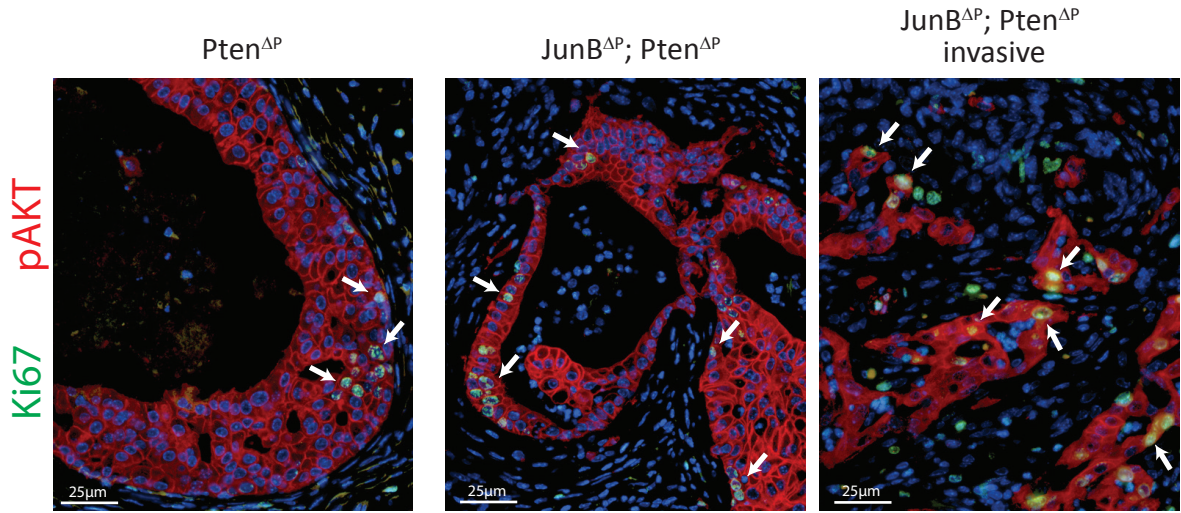

b

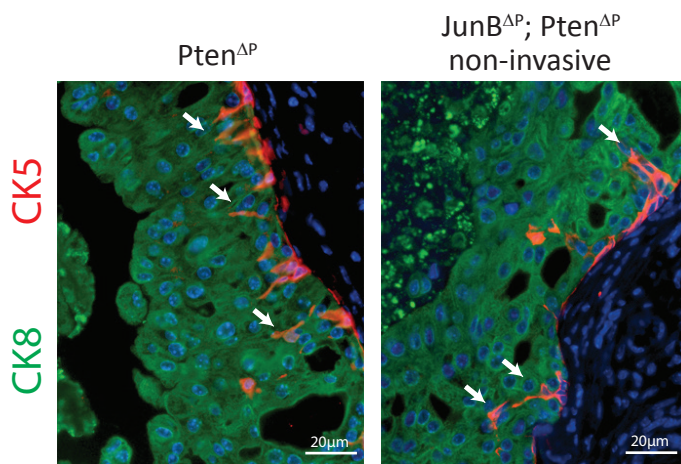

c

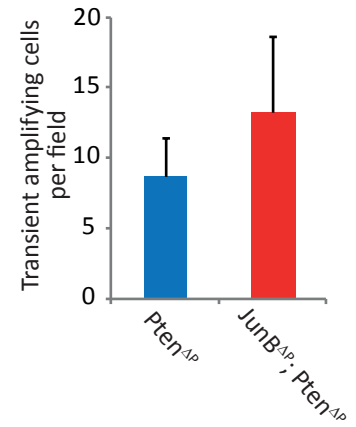

d

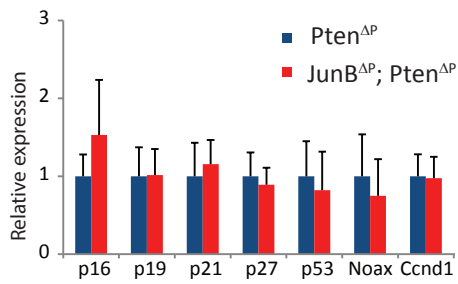

e

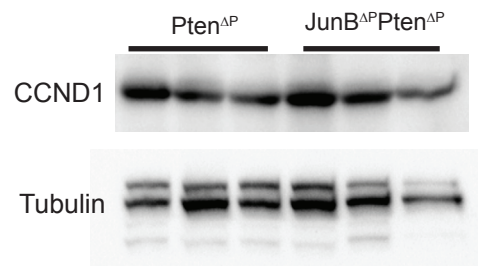

f

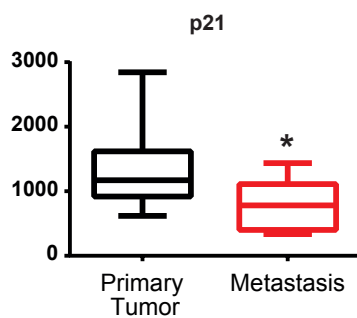

Supplementary figure 3

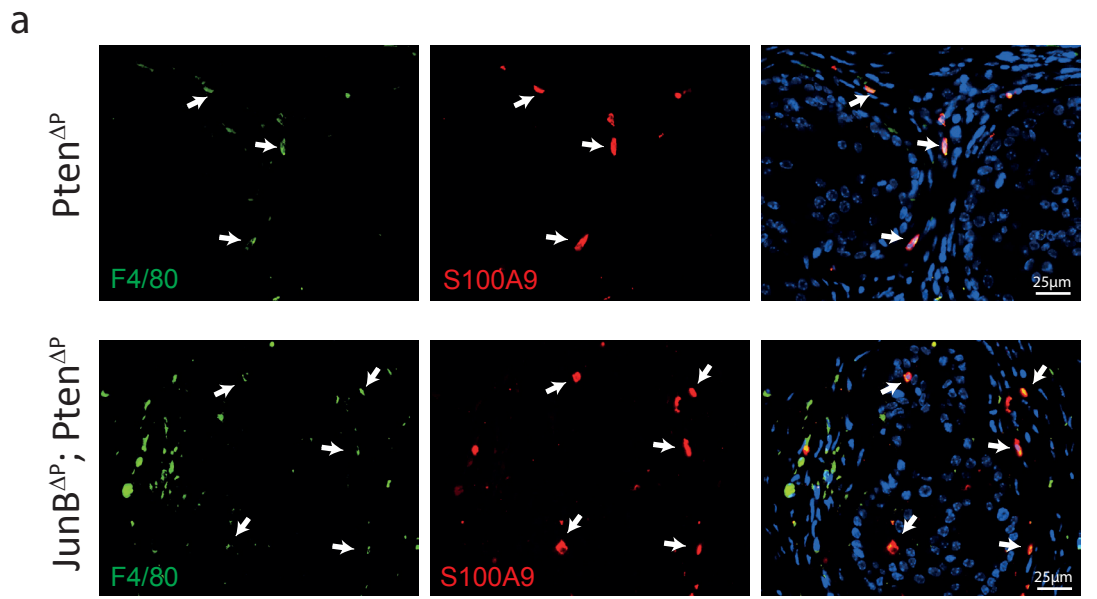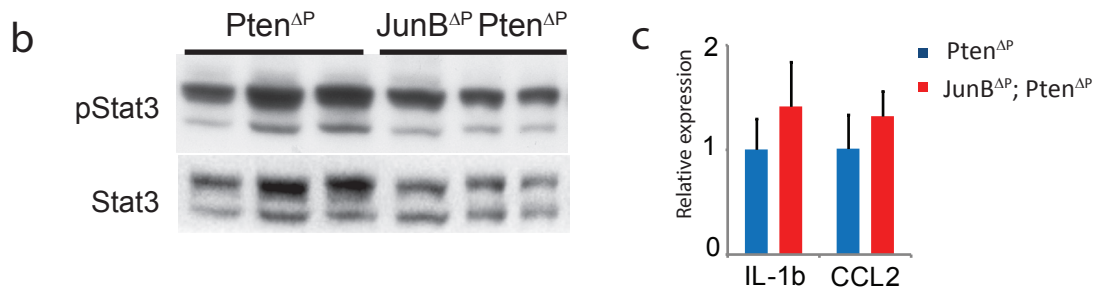

Supplementary figure S4

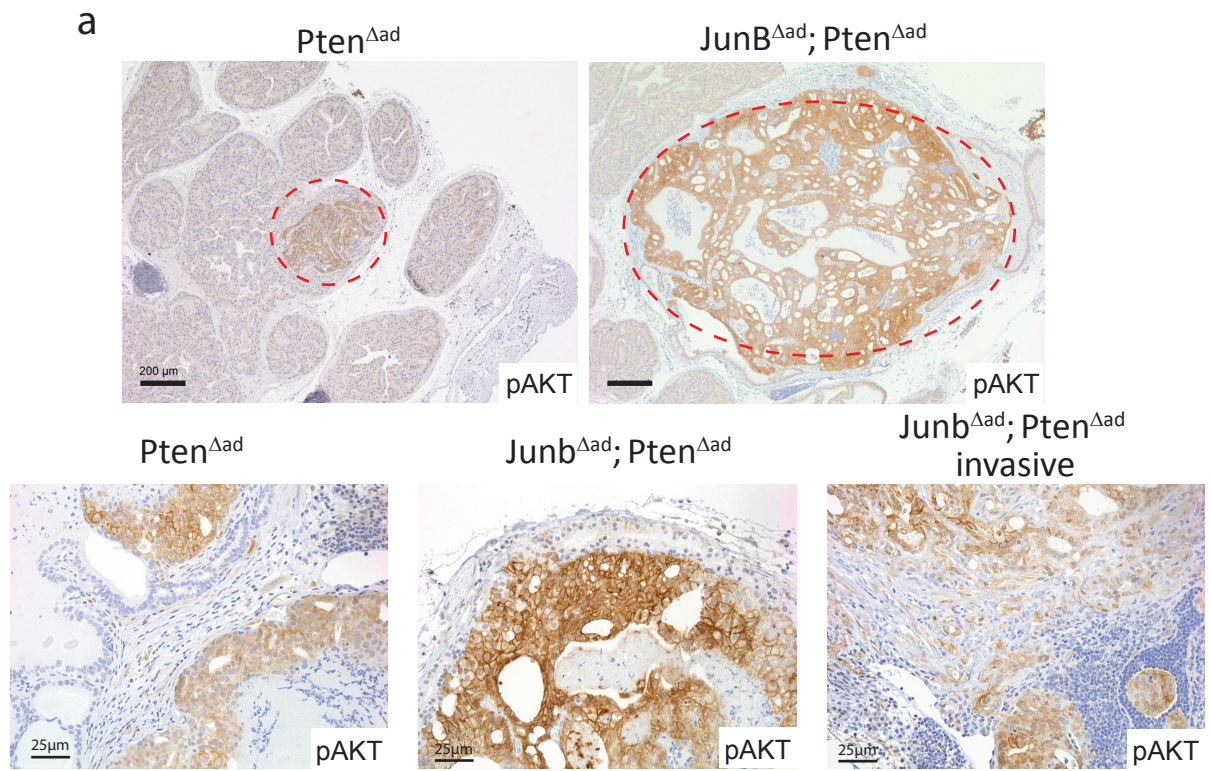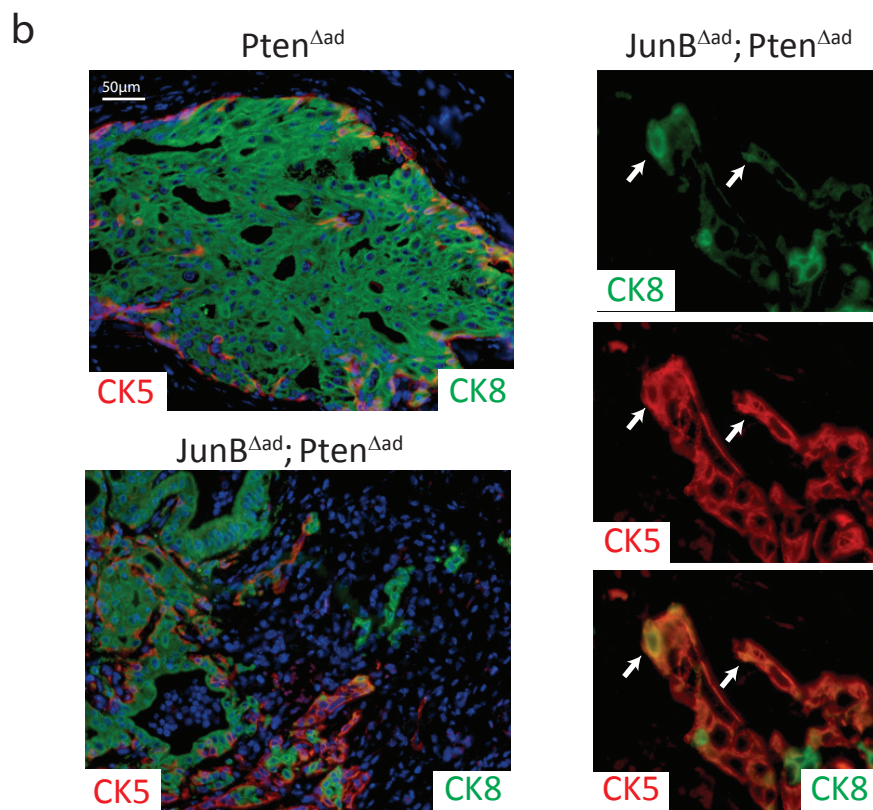

Supplementary figure 5

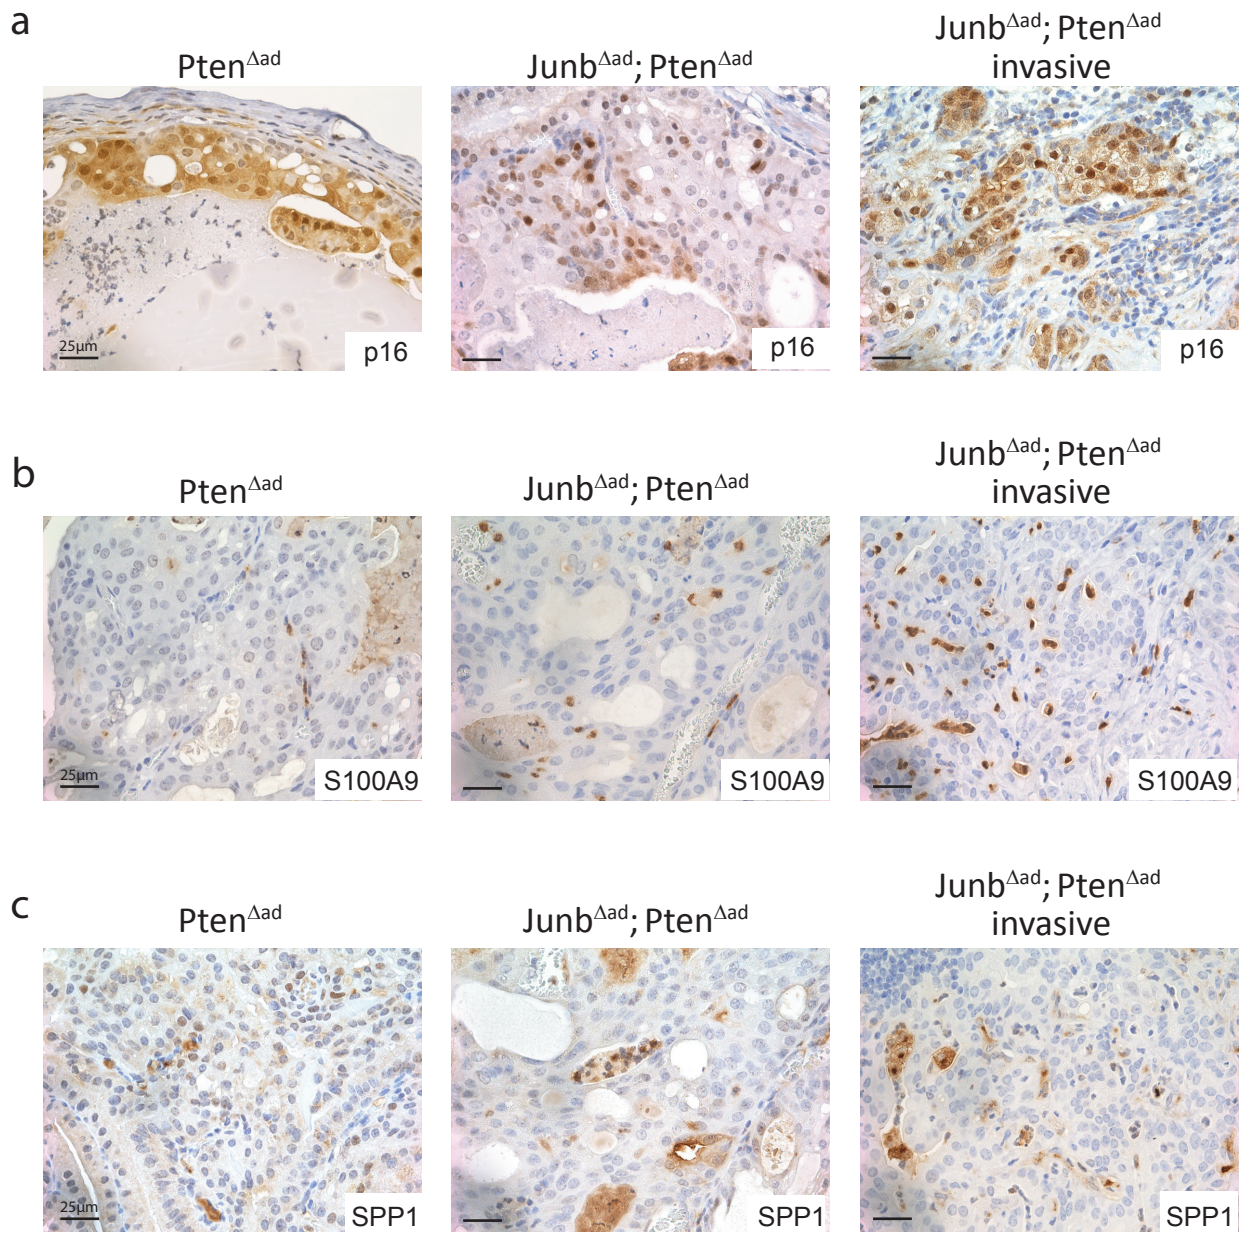

Supplementary figure S6
